# Supplementary material
Source: Springer Nature journal article supplement (https://www.springerprofessional.de/resource/supplementary/13638_2011_204_MOESM6_ESM.pdf/11897206)

$\|M - M_{\infty}\|$

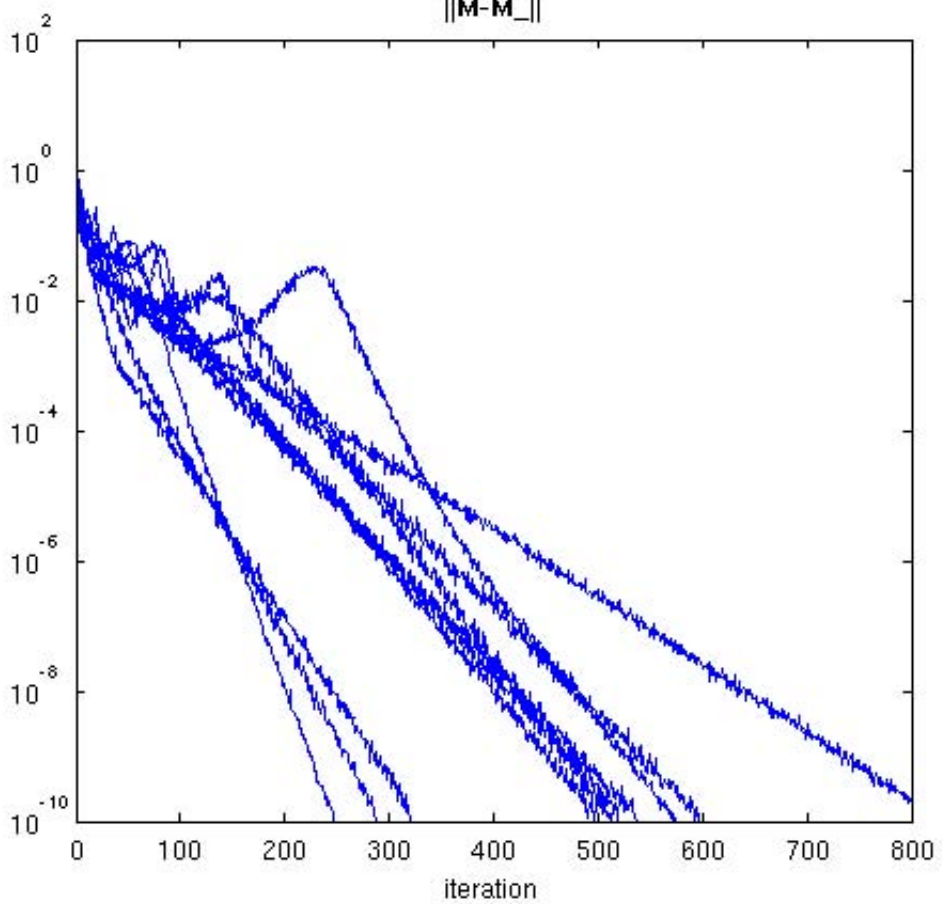

Supplement: MOESM6 [file 11897206]
